# Supplementary material
Source: HighWire-hosted journal article supplement (https://rmdopen.bmj.com/content/3/2/e000524)
Supplement: inline-supplementary-material-1 [file inline-supplementary-material-1.docx]

**Supplementary Files**

**Table S1: Search terms**

Pubmed

("Spondylitis, Ankylosing" OR "Spondylitis Ankylosing"[Title/Abstract] OR "AS"[Title/Abstract] OR “axial SpA”[Title/Abstract] OR “Ankylosing Spondylitis”[Title/Abstract] OR “axial spondyloarthritis”[Title/Abstract] OR "non-radiographic axial spondyloarthritis"[All Fields] OR "nr-axSpA"[All Fields] OR (“axial” AND “spondyl*”) OR ("Spond*" AND (ankylo* OR rheumat*)))

AND

("Infliximab" OR infliximab[Title/Abstract] OR remicade[Title/Abstract] OR Inflectra[Title/Abstract] OR "CT-P13" [Supplementary Concept] OR remsima[Title/Abstract] OR "Adalimumab" OR adalimumab[Title/Abstract] OR humira[Title/Abstract] OR "golimumab"[Supplementary Concept] OR golimumab[Title/Abstract] OR simponi[Title/Abstract] OR "Etanercept" OR etanercept[Title/Abstract] OR enbrel[Title/Abstract] OR "Certolizumab Pegol" OR certolizumab[Title/Abstract] OR "certolizumab pegol"[Title/Abstract] OR cimzia[Title/Abstract] OR "Ustekinumab" OR ustekinumab[Title/Abstract] OR stelara[Title/Abstract] OR "secukinumab"[Supplementary Concept] OR secukinumab[Title/Abstract] OR cosentyx[Title/Abstract] OR Apremilast[All Fields] OR "Tumor Necrosis Factor-alpha/antagonists and inhibitors" OR "tumor necrosis factor-alpha antagonists"[Title/Abstract] OR "tumor necrosis factor-alpha inhibitors"[Title/Abstract] OR "anti-tumor necrosis factor-alpha"[Title/Abstract] OR "anti-tnf alpha"[Title/Abstract] OR "anti-tnf"[Title/Abstract])

AND

(BASDAI[Title/Abstract] OR “Bath Ankylosing Spondylitis Disease Activity Index”[Title/Abstract]

OR BASFI[Title/Abstract] OR “Bath Ankylosing Spondylitis Functional Index”[Title/Abstract]

OR BASMI[Title/Abstract] OR “bath ankylosing spondylitis metrology index”[Title/Abstract]

OR ASDAS[Title/Abstract] OR “Ankylosing Spondylitis Disease Activity Score”[Title/Abstract] OR ASAS*[Title/Abstract] OR “ASAS partial remission”[Title/Abstract]

OR "modified Stoke Ankylosing Spondylitis Spine Score"[Title/Abstract] OR "mSASSS"[Title/Abstract] OR “Modified Stoke Ankylosing Spondylitis Spinal Score”[Title/Abstract])

NOT ("Animals" NOT ("Animals" AND "Humans"))

Filters: Publication date from 2008/01/01 to 2016/12/31; English; French; Spanish

Embase

'ankylosing spondylitis'/de OR 'spondylitis ankylosing':ab,ti OR 'axial spa':ab,ti OR 'ankylosing spondylitis':ab,ti OR 'axial spondyloarthritis':ab,ti OR 'non-radiographic axial spondyloarthritis':ab,ti OR 'nr-axspa':ab,ti OR (axial:ab,ti AND spondyl*:ab,ti) OR (spond*:ab,ti AND (ankylo*:ab,ti OR rheumat*:ab,ti)) AND ('tumor necrosis factor alpha antagonists':ab,ti OR 'anti-tumor necrosis factor agent':ab,ti OR 'tumor necrosis factor inhibitor'/exp OR 'tumor necrosis factor inhibitor':ab,ti OR 'tumor necrosis factor alpha inhibitor'/exp OR 'tumor necrosis factor alpha inhibitor':ab,ti OR 'anti-tumor necrosis factor-alpha':ab,ti OR 'anti-tnf alpha':ab,ti OR 'anti-tnf':ab,ti OR 'infliximab'/exp OR infliximab:ab,ti OR 'remicade'/exp OR remicade:ab,ti OR inflectra:ab,ti OR 'ct-p13':ab,ti OR remsima:ab,ti OR 'etanercept'/exp OR etanercept:ab,ti OR 'enbrel'/exp OR enbrel:ab,ti OR 'adalimumab'/exp OR adalimumab:ab,ti OR 'humira'/exp OR humira:ab,ti OR 'golimumab'/exp OR golimumab:ab,ti OR 'simponi'/exp OR simponi:ab,ti OR 'certolizumab pegol'/exp OR 'certolizumab':ab,ti OR 'cimzia'/exp OR cimzia:ab,ti OR 'ustekinumab'/exp OR ustekinumab:ab,ti OR stelara:ab,ti OR 'secukinumab'/exp OR secukinumab:ab,ti OR 'apremilast'/exp OR apremilast:ab,ti OR cosentyx:ab,ti)

AND

(BASDAI:ab,ti OR “Bath Ankylosing Spondylitis Disease Activity Index”:ab,ti OR BASFI:ab,ti OR “Bath Ankylosing Spondylitis Functional Index”:ab,ti OR BASMI:ab,ti OR “bath ankylosing spondylitis metrology index”:ab,ti OR ASDAS:ab,ti OR “Ankylosing Spondylitis Disease Activity Score”:ab,ti OR ASAS*:ab,ti OR “ASAS partial remission”:ab,ti OR "modified Stoke Ankylosing Spondylitis Spine Score":ab,ti OR "mSASSS":ab,ti OR “Modified Stoke Ankylosing Spondylitis Spinal Score”:ab,ti)

NOT ('animals'/exp NOT ('animals'/exp AND 'humans'/exp)) AND [embase]/lim NOT [medline]/lim AND ([english]/lim OR [[25](#_ENREF_25)]/lim OR [[26](#_ENREF_26)]/lim) AND [2008-2016]/py

Cochrane

ID Search Hits

#1 MeSH descriptor: [Spondylitis, Ankylosing] explode all trees

#2 ("Spondylitis Ankylosing" or "Ankylosing Spondylitis" or "axial SpA" or "axial spondyloarthritis" or "non-radiographic axial spondyloarthritis" or "nr-axSpA"):ab,ti

#3 ("axial" near/4 "spondyl*"):ab,ti

#4 ("Spond*" near/4 (ankylo* or rheumat*)):ab,ti

#5 #1 or #2 or #3 or #4

#6 ("Tumor Necrosis Factor-alpha" or "anti-tumor necrosis factor agent" or "anti-TNF" or infliximab or remicade or Inflectra or "CT-P13" or remsima or etanercept or enbrel or adalimumab or humira or golimumab or Simponi or certolizumab or cimzia or ustekinumab or stelara or secukinumab or cosentyx or apremilast):ab,ti

#7 MeSH descriptor: [Tumor Necrosis Factor-alpha] explode all trees and with qualifier(s): [Antagonists & inhibitors - AI]

#8 #6 or #7

#9 #5 and #8

#10 (BASDAI or "Bath Ankylosing Spondylitis Disease Activity Index" or BASFI or "Bath Ankylosing Spondylitis Functional Index" or BASMI or "bath ankylosing spondylitis metrology index" or ASDAS or "Ankylosing Spondylitis Disease Activity Score" or ASAS* or "ASAS partial remission" or "modified Stoke Ankylosing Spondylitis Spine Score" or "mSASSS" or "Modified Stoke Ankylosing Spondylitis Spinal Score"):ab,ti

#11 #9 and #10 Publication Year from 2008 to 2016

**Table S2: Exclusion criteria for full-text reviewed articles**

| **Reference** | **Exclusion criteria** |
| --- | --- |
| Baeten et al, 2013, [1] | Wrong population |
| Baeten et al, 2015, [2] | Insufficient data |
| Baraliakos et al, 2016, [3] | Wrong population |
| Braun et al, 2012, [4] | Wrong population |
| Braun et al, 2015, [5] | Wrong population |
| Braun et al, 2015, [6] | Wrong objective |
| Braun et al, 2011, [7] | Wrong population |
| Callhoff et al, 2015, [8] | Wrong population |
| Cheung et al, 2008, [9] | Wrong population |
| Ciurea et al, 2013, [10] | Wrong population |
| Coates et al, 2008, [11] | Wrong population |
| Corbett et al, 2016, [12] | Wrong design |
| Davis et al, 2008, [13] | Wrong population |
| Dougados et al, 2012, [14] | Wrong population |
| Escudero-Vilaplana et al, 2015, [15] | Insufficient data |
| Glintborg et al, 2010, [16] | Wrong population |
| Inman et al, 2008, [17] | Wrong population |
| Kalyoncu et al, 2015, [18] | Wrong objective |
| Landewé et al, 2014, [19] | Insufficient data |
| Lekpa et al, 2012, [20] | Wrong population |
| Lekpa et al, 2012, [21] | Wrong population |
| Park et al, 2013, [22] | Wrong population |
| Pathan et al, 2013, [23] | Wrong population |
| Plasencia et al, 2013, [24] | Insufficient data |
| Poddubnyy et al, 2013, [25] | Wrong population |
| Rahman et al, 2016, [26] | Wrong population |
| Ruwaard et al, 2015, [27] | Wrong population |
| Sieper et al, 2013, [28] | Wrong population |
| Sieper et al, 2015, [29] | Wrong population |
| Sieper et al, 2015, [30] | Wrong population |
| Sieper et al, 2017, [31] | Wrong population |
| Song et al, 2010, [32] | Wrong population |
| Song et al, 2011, [33] | Wrong population |
| van der Heijde et al, 2008, [34] | Wrong population |
| van der Heijde et al, 2011. [35] | Wrong population |
| Wang et al, 2014, [36] | Wrong population |

**References**

1. Baeten D, Baraliakos X, Braun J, et al. Anti-interleukin-17A monoclonal antibody secukinumab in treatment of ankylosing spondylitis: a randomised, double-blind, placebo-controlled trial. Lancet 2013;382(9906):1705-13.

2. Baeten D, Sieper J, Braun J, et al. Secukinumab, an Interleukin-17A Inhibitor, in Ankylosing Spondylitis. N Engl J Med 2015;373(26):2534-48.

3. Baraliakos X, Borah B, Braun J, et al. Long-term effects of secukinumab on MRI findings in relation to clinical efficacy in subjects with active ankylosing spondylitis: an observational study. Ann Rheum Dis 2016;75:408-12.

4. Braun J, Baraliakos X, Hermann KG, et al. Golimumab reduces spinal inflammation in ankylosing spondylitis: MRI results of the randomised, placebo- controlled GO-RAISE study. Ann Rheum Dis 2012;71(6):878-84.

5. Braun J, Maksymowych WP, Landewé R, et al. Achievement of remission of inflammation in the spine and sacroiliac joints measured by magnetic resonance imaging (MRI) in patients with axial spondyloarthritis, and associations between MRI and clinical remission, over 96 weeks of treatment with Certolizumab Pegol. Annals of the Rheumatic Diseases 2015;74134-35.

6. Braun J, Sieper J, Aelion J, et al. Secukinumab improves multiple parameters of disease activity in subjects with active ankylosing spondylitis through 52 weeks of subcutaneous therapy: Data from the phase 3 measure 2 study. Annals of the Rheumatic Diseases 2015;741147.

7. Braun J, van der Horst-Bruinsma IE, Huang F, et al. Clinical efficacy and safety of etanercept versus sulfasalazine in patients with ankylosing spondylitis: a randomized, double-blind trial. Arthritis Rheum 2011;63(6):1543-51.

8. Callhoff J, Sieper J, Weiss A, et al. Efficacy of TNFalpha blockers in patients with ankylosing spondylitis and non-radiographic axial spondyloarthritis: a meta-analysis. Ann Rheum Dis 2015;74(6):1241-8.

9. Cheung PP, Tymms KE, Wilson BJ, et al. Infliximab in severe active ankylosing spondylitis with spinal ankylosis. Intern Med J 2008;38(6):396-401.

10. Ciurea A, Scherer A, Exer P, et al. Tumor necrosis factor alpha inhibition in radiographic and nonradiographic axial spondyloarthritis: results from a large observational cohort. Arthritis Rheum 2013;65(12):3096-106.

11. Coates LC, Cawkwell LS, Ng NW, et al. Real life experience confirms sustained response to long-term biologics and switching in ankylosing spondylitis. Rheumatology (Oxford) 2008;47(6):897-900.

12. Corbett M, Soares M, Jhuti G, et al. Tumour necrosis factor-alpha inhibitors for ankylosing spondylitis and non-radiographic axial spondyloarthritis: a systematic review and economic evaluation. Health Technol Assess 2016;20(9):1-334.

13. Davis JC, Jr., van der Heijde DM, Braun J, et al. Efficacy and safety of up to 192 weeks of etanercept therapy in patients with ankylosing spondylitis. Ann Rheum Dis 2008;67(3):346-52.

14. Dougados M, Braun J, Szanto S, et al. Continuous efficacy of etanercept in severe and advanced ankylosing spondylitis: results from a 12-week open-label extension of the SPINE study. Rheumatology (Oxford) 2012;51(9):1687-96.

15. Escudero-Vilaplana V, Ramirez-Herraiz E, Alanon-Plaza E, et al. Efficiency of adalimumab, etanercept and infliximab in ankylosing spondylitis in clinical practice. Int J Clin Pharm 2015;37(5):808-14.

16. Glintborg B, Ostergaard M, Krogh NS, et al. Predictors of treatment response and drug continuation in 842 patients with ankylosing spondylitis treated with anti-tumour necrosis factor: results from 8 years' surveillance in the Danish nationwide DANBIO registry. Ann Rheum Dis 2010;69:2002-8.

17. Inman RD, Davis J, van der Heijde D, et al. Efficacy and safety of golimumab in patients with ankylosing spondylitis: results of a randomized, double-blind, placebo-controlled, phase III trial. Arthritis Rheum 2008;58:3402-12.

18. Kalyoncu U, Babaoglu H, Erden A, et al. Anti-TNF alpha drugs retention rate at ankylosing spondylitis and axial spondyloarthritis: HUR-BIO real life results. Ann Rheum Dis 2015;74:279-80.

19. Landewe R, Braun J, Deodhar A, et al. Efficacy of certolizumab pegol on signs and symptoms of axial spondyloarthritis including ankylosing spondylitis: 24-week results of a double-blind randomised placebo-controlled Phase 3 study. Ann Rheum Dis 2014;73:39-47.

20. Lekpa FK, Farrenq V, Canoui-Poitrine F, et al. Lack of efficacy of abatacept in axial spondylarthropathies refractory to tumor-necrosis-factor inhibition. Joint Bone Spine 2012;79(1):47-50.

21. Lekpa FK, Poulain C, Wendling D, et al. Is IL-6 an appropriate target to treat spondyloarthritis patients refractory to anti-TNF therapy? A multicentre retrospective observational study. Arthritis Res Ther 2012;14(2):R53.

22. Park W, Hrycaj P, Jeka S, et al. A randomised, double-blind, multicentre, parallel-group, prospective study comparing the pharmacokinetics, safety, and efficacy of CT-P13 and innovator infliximab in patients with ankylosing spondylitis: the PLANETAS study. Ann Rheum Dis 2013;72(10):1605-12.

23. Pathan E, Abraham S, Van Rossen E, et al. Efficacy and safety of apremilast, an oral phosphodiesterase 4 inhibitor, in ankylosing spondylitis. Ann Rheum Dis 2013;72(9):1475-80.

24. Plasencia C, Pascual-Salcedo D, Garcia-Carazo S, et al. The immunogenicity to the first anti-TNF therapy determines the outcome of switching to a second anti-TNF therapy in spondyloarthritis patients. Arthritis Res Ther 2013;15(4):R79.

25. Poddubnyy D, Callhoff J, Listing J, et al. Ustekinumab for the treatment of patients with active ankylosing spondylitis: Results of a 28-week, prospective, open-label, proof-of-concept study (Topas). Arthritis and Rheumatism 2013;65S766.

26. Rahman P, Choquette D, Bensen WG, et al. Biologic Treatment Registry Across Canada (BioTRAC): a multicentre, prospective, observational study of patients treated with infliximab for ankylosing spondylitis. BMJ Open 2016;6(4):e009661.

27. Ruwaard J, Kneepkens E, Marsman A, et al. Efficacy of switching tumor necrosis factor α inhibitor to a second tumor necrosis factor α inhibitor and the influence of drug levels and anti-drug antibodies in patients with ankylosing spondylitis and psoriatic arthritis. Annals of the Rheumatic Diseases 2015;74271.

28. Sieper J, Porter-Brown B, Thompson L, et al. Tocilizumab (TCZ) is not effective for the treatment of ankylosing spondylitis (AS): Results of a phase 2, international, multicentre, randomised, double-blind, placebo-controlled trial. Annals of the Rheumatic Disease 2013;71

29. Sieper J, Landewe R, Rudwaleit M, et al. Effect of certolizumab pegol over ninety-six weeks in patients with axial spondyloarthritis: results from a phase III randomized trial. Arthritis Rheumatol 2015;67(3):668-77.

30. Sieper J, van der Heijde D, Dougados M, et al. A randomized, double-blind, placebo-controlled, sixteen-week study of subcutaneous golimumab in patients with active nonradiographic axial spondyloarthritis. Arthritis Rheumatol 2015;67(10):2702-12.

31. Sieper J, Deodhar A, Marzo-Ortega H, et al. Secukinumab efficacy in anti-TNF-naive and anti-TNF-experienced subjects with active ankylosing spondylitis: results from the MEASURE 2 Study. Ann Rheum Dis 2017;76(3):571-92.

32. Song IH, Heldmann F, Rudwaleit M, et al. Different response to rituximab in tumor necrosis factor blocker-naive patients with active ankylosing spondylitis and in patients in whom tumor necrosis factor blockers have failed: a twenty-four-week clinical trial. Arthritis Rheum 2010;62(5):1290-7.

33. Song IH, Heldmann F, Rudwaleit M, et al. Treatment of active ankylosing spondylitis with abatacept: an open-label, 24-week pilot study. Ann Rheum Dis 2011;70(6):1108-10.

34. van der Heijde D, Pangan AL, Schiff MH, et al. Adalimumab effectively reduces the signs and symptoms of active ankylosing spondylitis in patients with total spinal ankylosis. Ann Rheum Dis 2008;67(9):1218-21.

35. van der Heijde D, Sieper J, Maksymowych WP, et al. 2010 Update of the international ASAS recommendations for the use of anti-TNF agents in patients with axial spondyloarthritis. Ann Rheum Dis 2011;70(6):905-8.

36. Wang H, Zuo D, Sun M, et al. Randomized, placebo controlled and double-blind trials of efficacy and safety of adalimumab for treating ankylosing spondylitis: a meta-analysis. Int J Rheum Dis 2014;17(2):142-8.
